# Supplementary material for: Three-dimensional reconstruction of a biliary system in a bioengineered liver using decellularized scaffold
Source: Research Square preprint supplement (doi:10.21203/rs.3.rs-7659575/v1), 2025-11-20
Supplement: Supplementary file 1 [file 895a0bc7a84d7c5cb8318070.docx]

**Three-dimensional reconstruction of biliary system in bioengineered liver using decellularized scaffold**

Hiroshi Horie1, Ken Fukumitsu1, 2, Yusuke Hanabata1, Takuma Karasuyama1, Kentaro Iwaki1, Fumiaki Munekage1, Kenta Makino1, Takashi Ito1, Katsuhiro Tomofuji1, Hidenobu Kojima1, Satoshi Ogiso1, Elena Yukie Uebayashi1, Hiroyuki Uematsu3 Roberto Coppo3 , Kunishige Onuma3, Masahiro Inoue3, Takamichi Ishii1, Etsuro Hatano1

1 Division of Hepato-Biliary-Pancreatic Surgery and Transplantation, Department of Surgery, Graduate School of Medicine, Kyoto University, 54 Shogo-in Kawahara-cho, Sakyo-ku, Kyoto, 606-8507, JAPAN.

2 Department of Surgery, Kyoto Katsura Hospital, 17 Yamadahirao-cho, Nisigyo-ku, Kyoto, 615-8256, JAPAN

3 Department of Clinical Bio-resource Research and Development, Graduate School of Medicine, Kyoto University, 46-29 Yosida-shimo-adachi-cho, Sakyo-ku, Kyoto, 606-8501 Japan

**Supplementary Materials**

| Reagent | Company | Final concentration | |
| --- | --- | --- | --- |
| Advanced DMEM | Gibco | 1 | x |
| Penicillin-Streptomycin | Gibco | 1 | % |
| Glutamax | Gibco | 1 | % |
| HEPES | Wako | 10 | mM |
| B27 supplement (50x), minus vitamin A | Gibco | 1 | x |
| N-Acetyl-L-cysteine | Wako | 1 | mM |
| RSPO1 conditioned medium | In house | 5 | % |
| Nicotinamide | Sigma | 10 | mM |
| [Leu15]-Gastrin I human, >=95% (HPLC) | Sigma | 10 | nM |
| EGF, Mouse, Recombinant, Carrier-free | R&D | 50 | ng/ml |
| Animal-Free Recombinant Human FGF-10 | Pepro Tech | 50 | ng/ml |
| Recombinant Human HGF (HEK293 derived) | Pepro Tech | 25 | ng/ml |
| Y-27632, Dihydrochloride Salt, >99%  **Table S1.** Compositions of organoid expansion medium | LC Laboratories | 10 | μM |

| Reagent | Company | Final concentration | |
| --- | --- | --- | --- |
| Advanced DMEM | Gibco | 1 | x |
| Penicillin-Streptomycin | Gibco | 1 | % |
| Glutamax | Gibco | 1 | % |
| HEPES | Wako | 10 | mM |
| B27 supplement (50x), minus vitamin A | Gibco | 1 | x |
| N-Acetyl-L-cysteine | Wako | 1 | mM |
| RSPO1 conditioned medium | In house | 5 | % |
| Nicotinamide | Sigma | 10 | mM |
| [Leu15]-Gastrin I human, >=95% (HPLC) | Sigma | 10 | nM |
| EGF, Mouse, Recombinant, Carrier-free | R&D | 50 | ng/ml |
| Animal-Free Recombinant Human FGF-10 | Pepro Tech | 50 | ng/ml |
| Recombinant Human HGF (HEK293 derived) | Pepro Tech | 25 | ng/ml |
| Y-27632, Dihydrochloride Salt, >99% | LC Laboratories | 10 | μM |
| Dexamethazone (1mM) | Sigma | 0.1 | μM |
| ITS-G (100x) | Gibco | 1 | x |
| FBS  **Table S2.** Compositions of co-culture medium for hepatocytes and liver ductal organoids | Gibco | 10 | % |

| Antibody | Ig Species | Company | Product code | Dilution |
| --- | --- | --- | --- | --- |
| KRT19 | Rabbit | Abcam | ab52625 | 1:400 |
| ALB | Sheep | Bethyl Laboratories | A110-134A | 1:400 |
| SOX9 | Rabbit | Merck Millipore | AB5535 | 1:400 |
| HNF4a | Rabbit | Abcam | ab201460 | 1:400 |
| GFP | Goat | Abcam | ab6673 | 1:1000 |
| MRP2 | Mouse | Abcam | ab3373 | 1:50 |
| ZO-1 | Rabbit | Invitrogen | 61-7300 | 1:200 |

**Primary antibody list**

**Secondary antibody list**

| Antibody | Company | Product code | Dilution |
| --- | --- | --- | --- |
| IgG Goat anti-Rabbit, Alexa Fluor 555 | Invitrogen | A-21428 | 1:1000 |
| IgG Goat anti-Mouse, Alexa Fluor 488 | Invitrogen | A-11001 | 1:1000 |
| IgG Donkey anti-Goat, Alexa Fluor 488 | Invitrogen | A-11055 | 1:1000 |
| IgG Donley anti-Sheep, Alexa Fluor 594 | Abcam | ab150180 | 1:1000 |

**Table S3.** Primary and secondary antibody list for immunofluorescence staining.

Bile canaliculi (-) (n = 5)

**
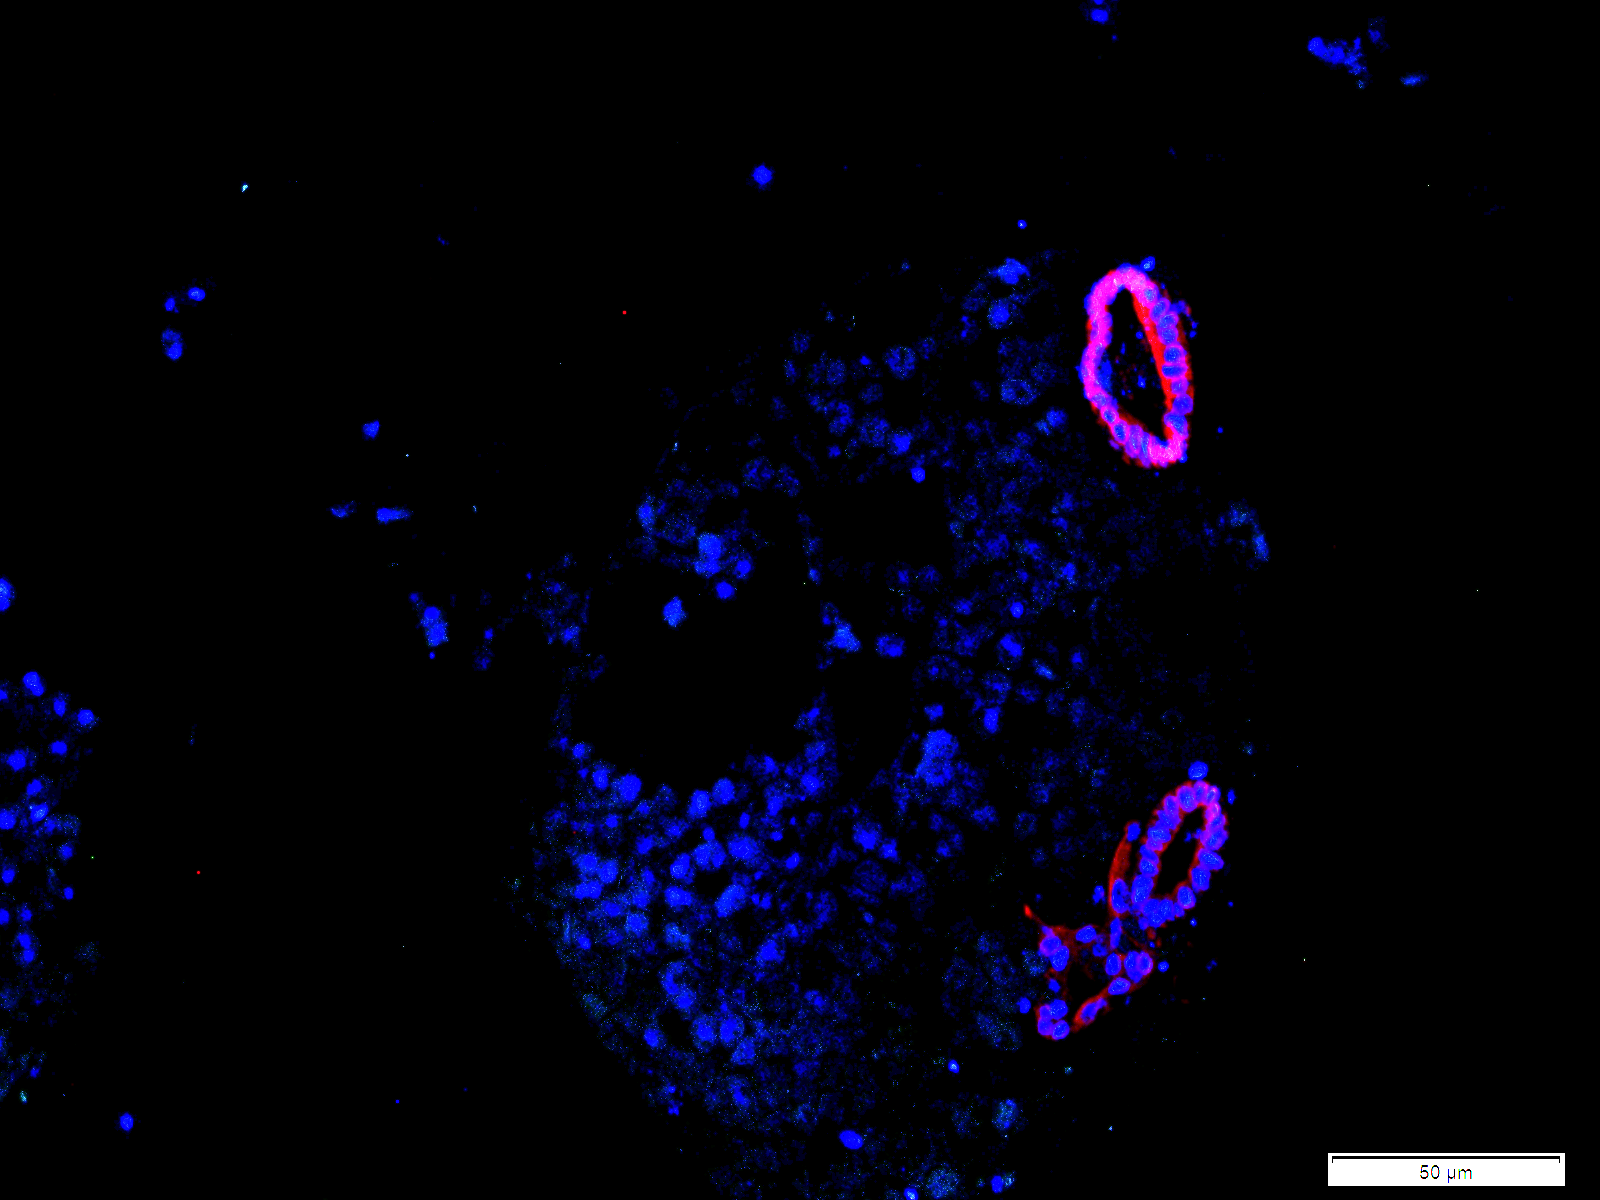

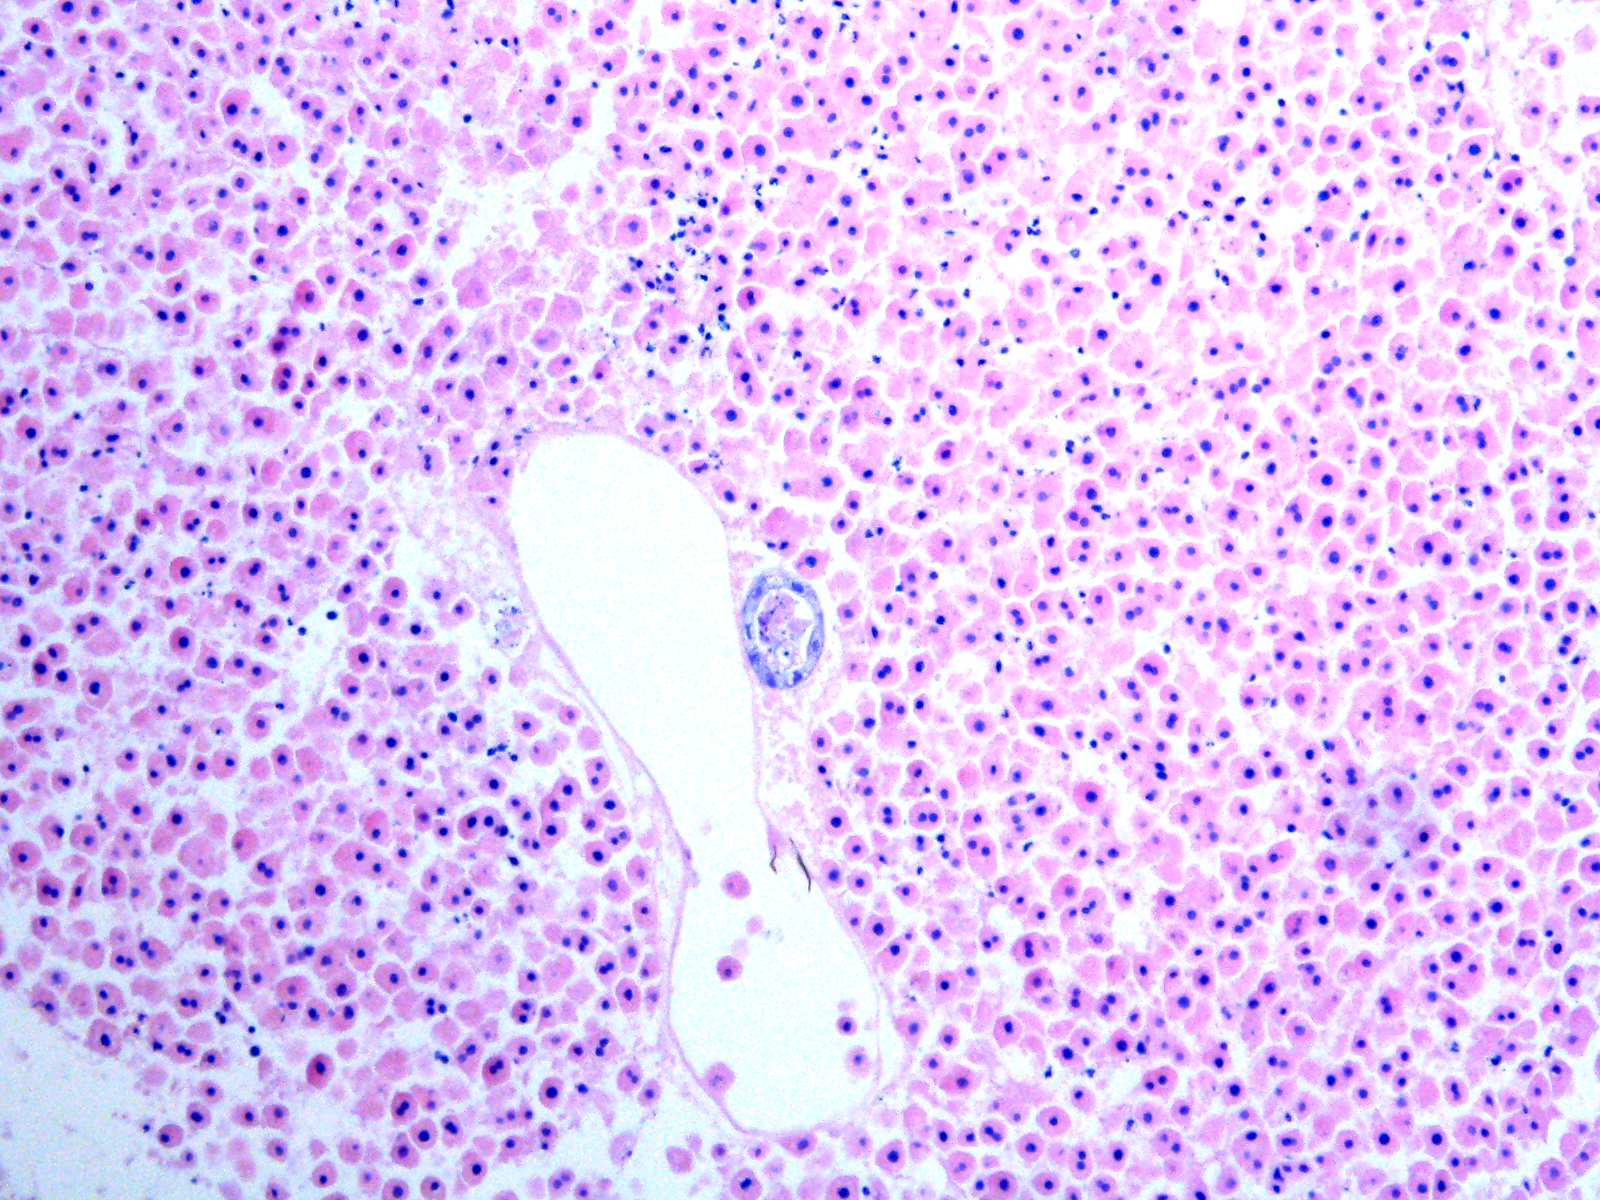

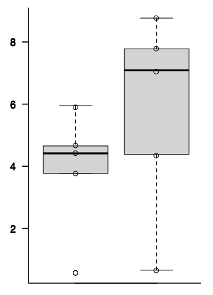
**

**Figure S1. Comparison of total bile acid concentrations between bile duct discharge and culture medium, with histological correlation.** Samples were collected from the cases lacking MRP2-positive bile canaliculi adjacent to the KRT19-positive bile ducts (n = 5, *p* = 0.310). Scale bars = 50 μm.

KRT19 / MRP2 / DAPI

Total Bile Acids (nmol/10^6 cells)

Bile discharge

Culture medium

*p =* 0.310

**
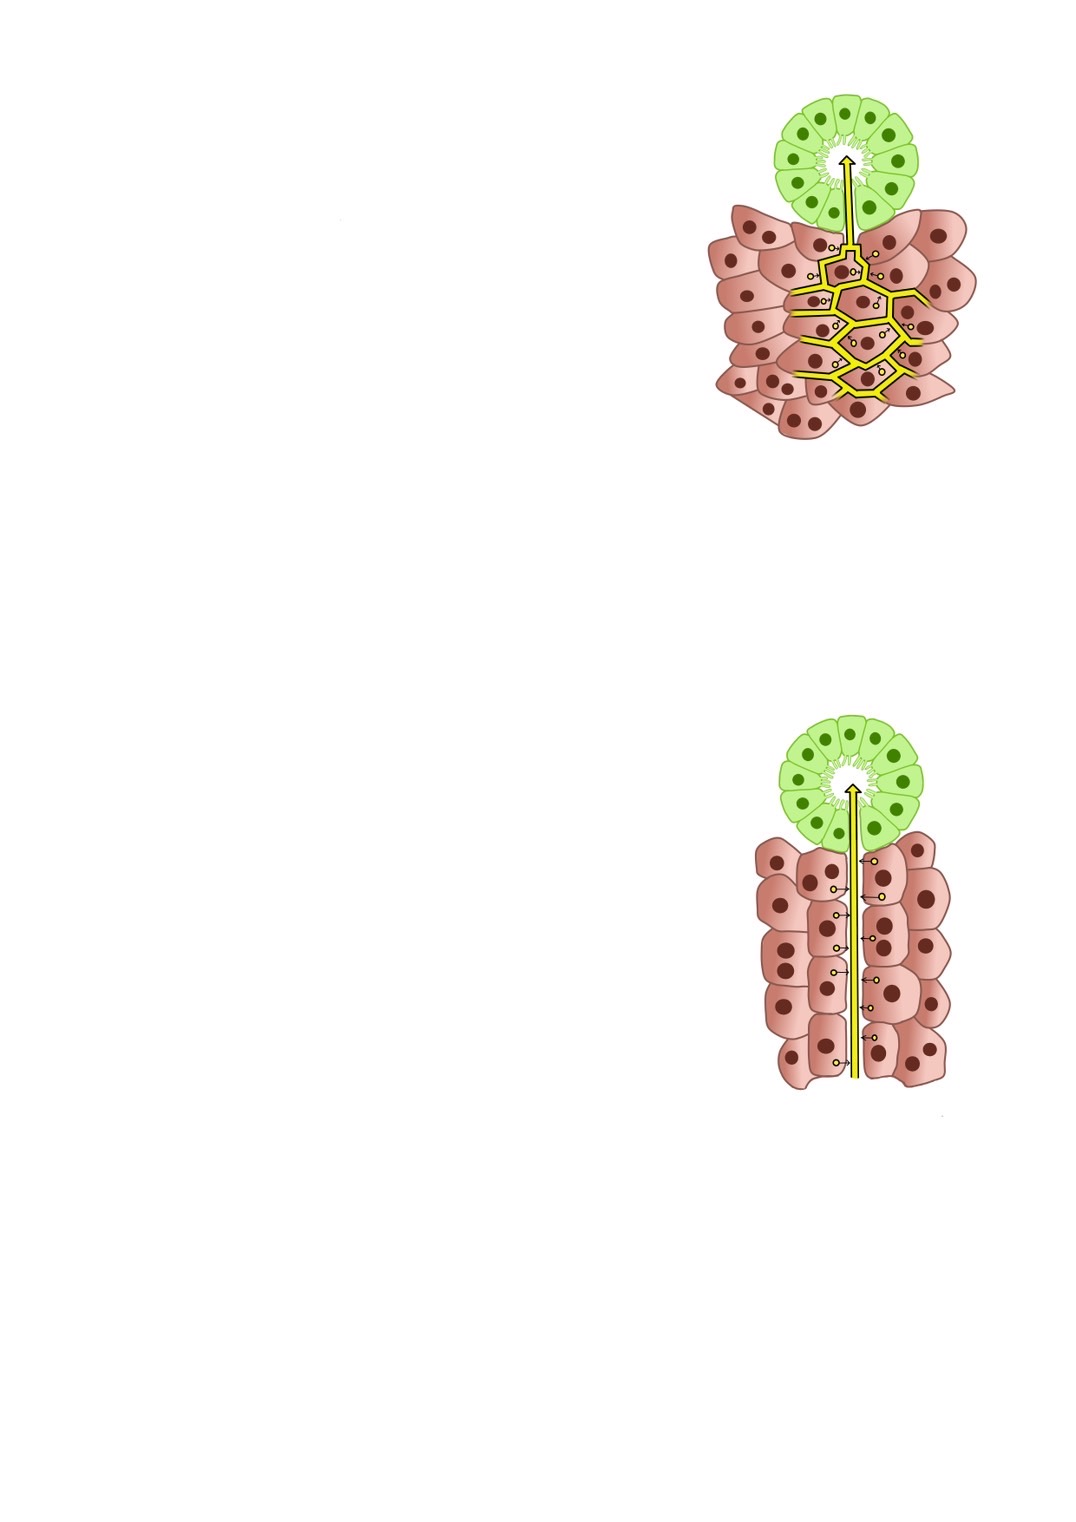

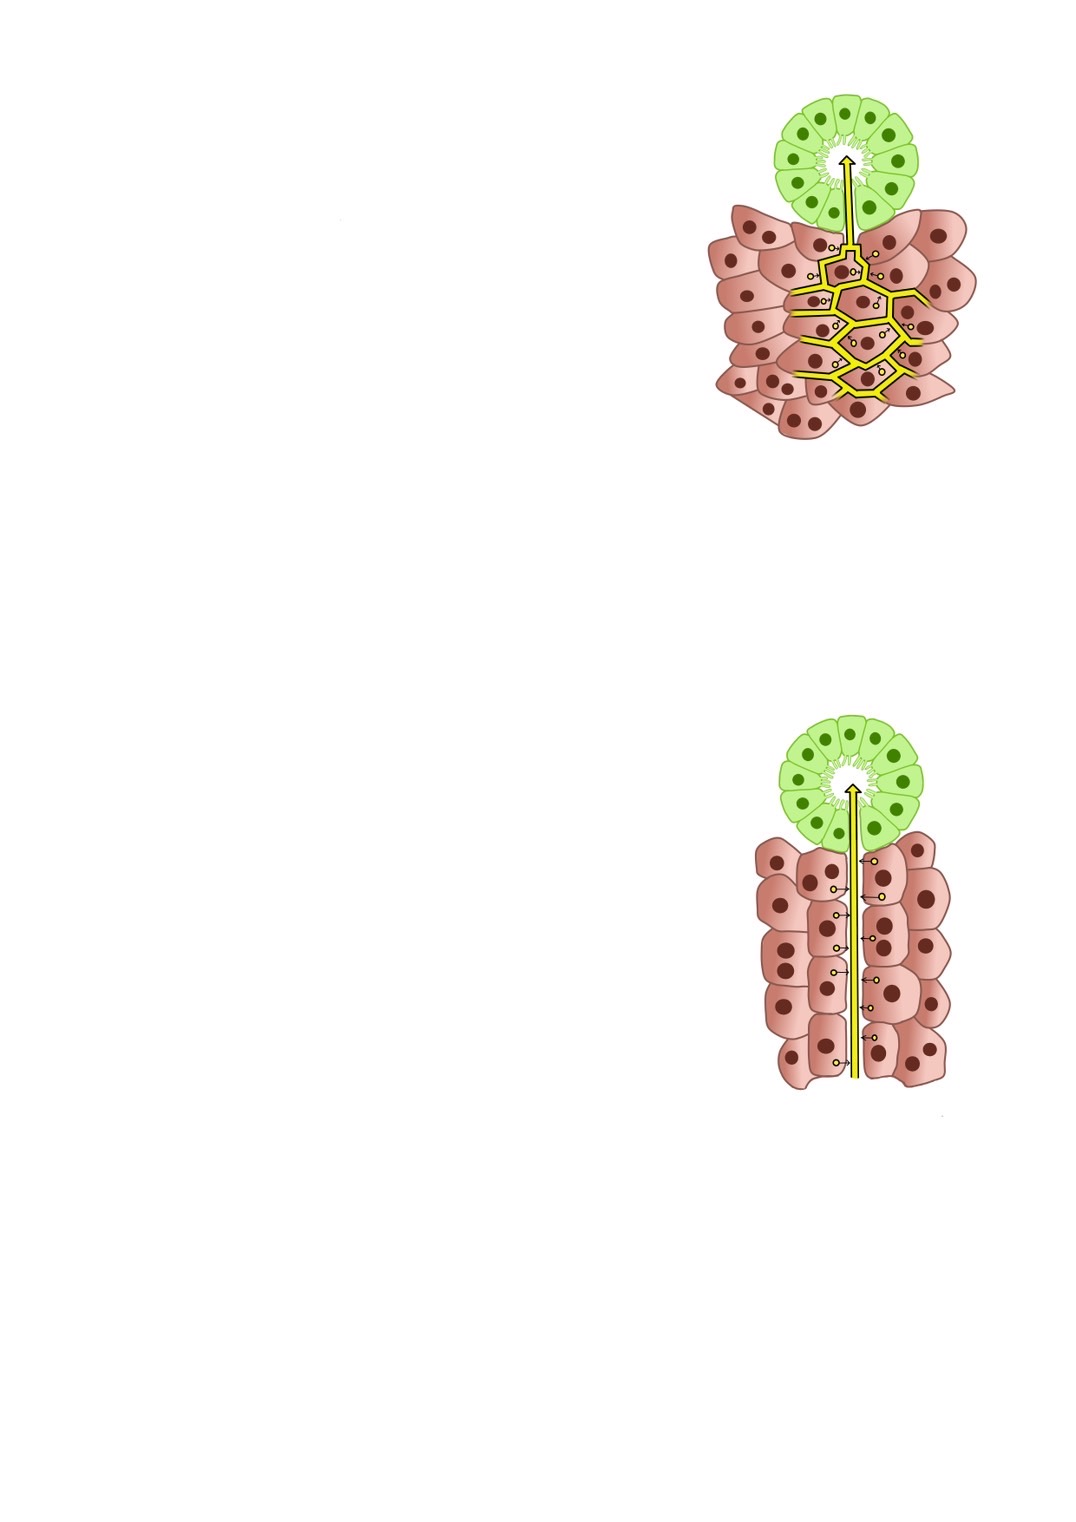

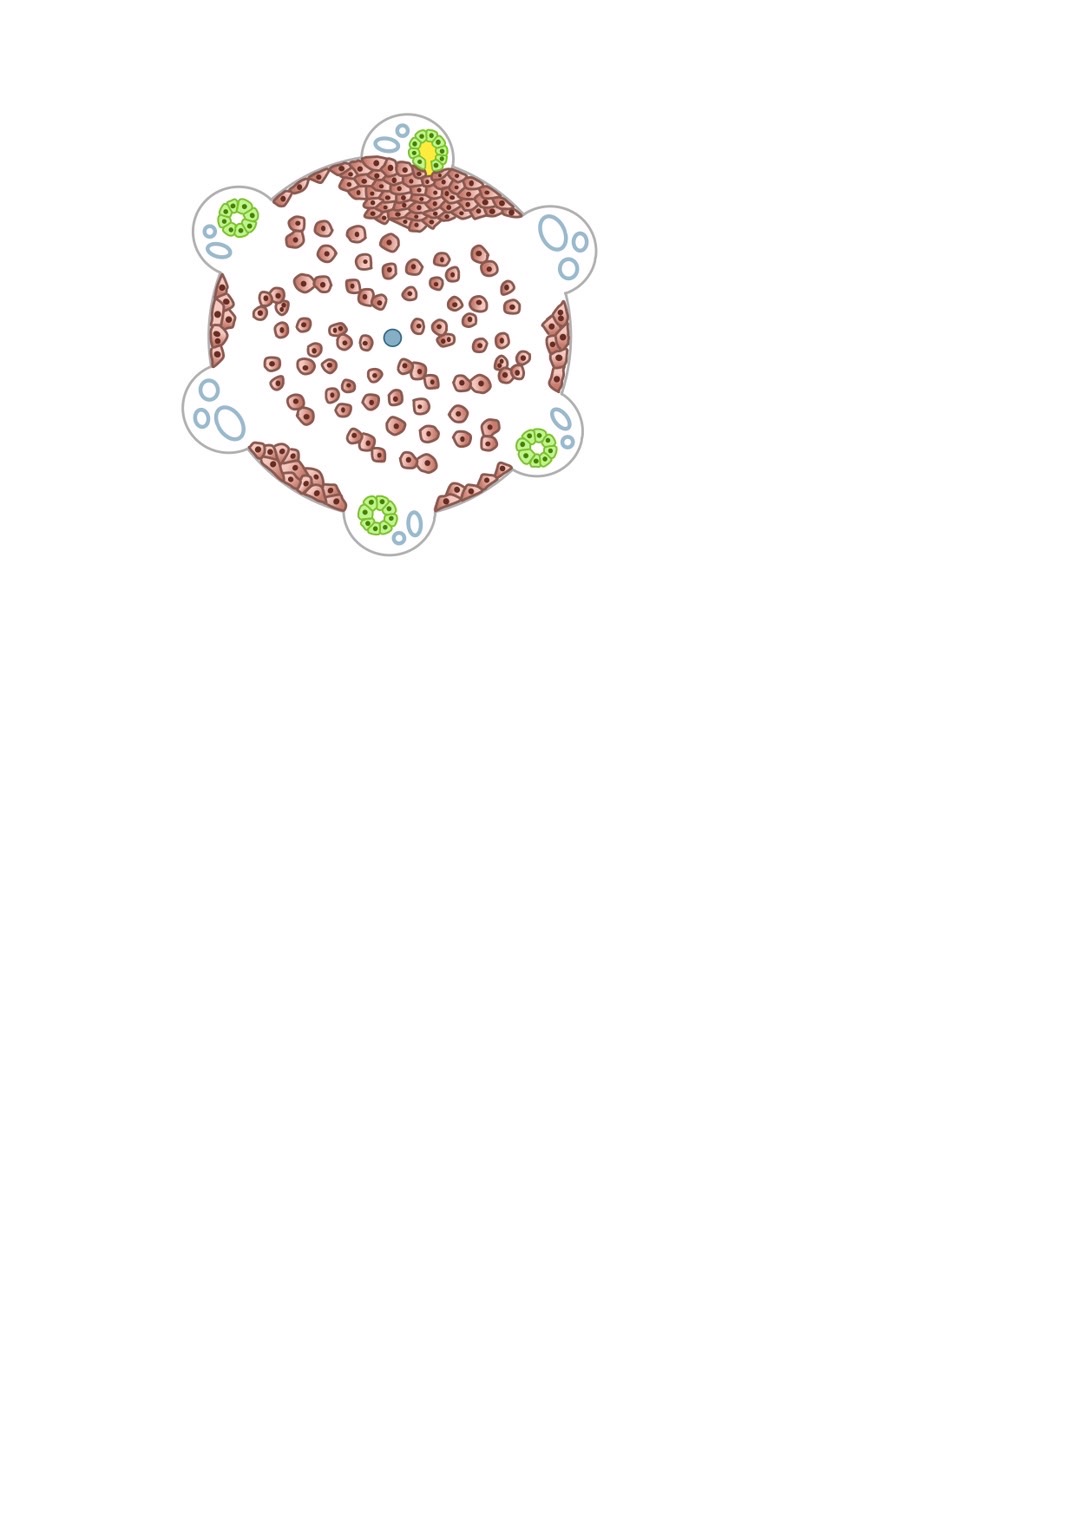

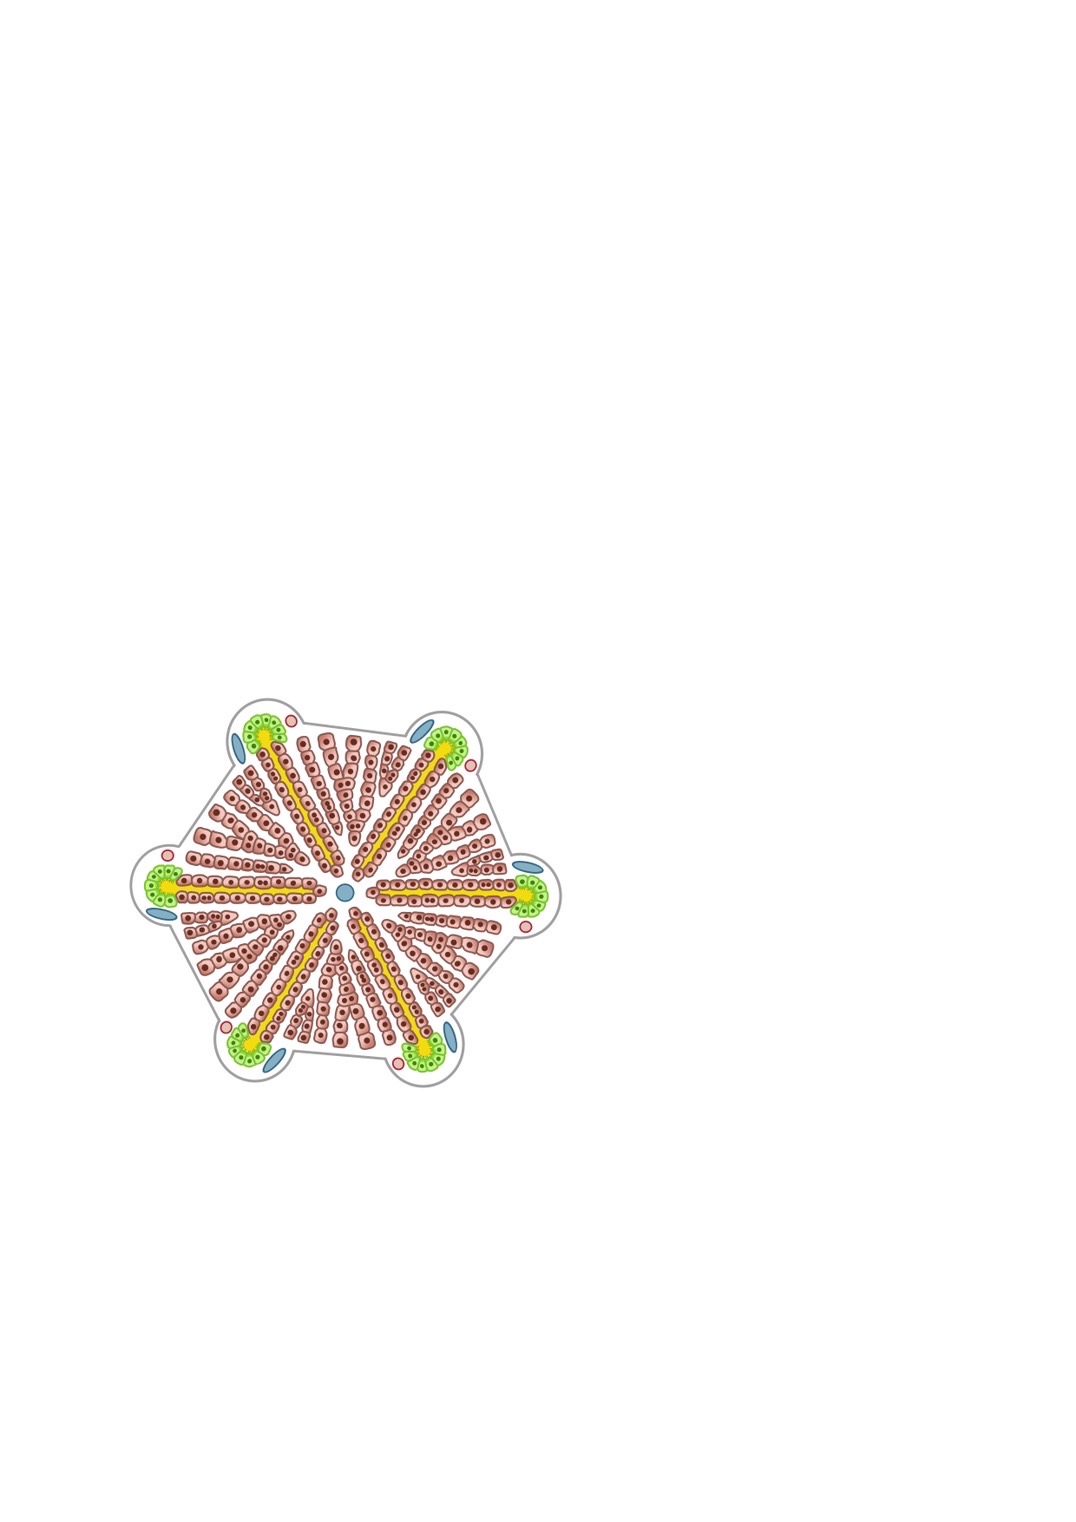
**

**Figure S2. The expected schematic diagram of the reconstructed bile excretion system in the recellularized liver.** The upper row illustrated the reconstructed hepatic lobule structure in the recellularized liver. In native liver, hepatocytes were arranged in a regular cord-like structure within the parenchymal space, with bile canaliculi connecting to the bile ducts. In the recellularized liver, hepatocytes were expected to engraft in a stacked manner along the ECM at the margins of the parenchymal space, with some connecting to the recellularized bile ducts. The lower row illustrated the anticipated mechanism of bile excretion in the recellularized liver, where bile produced by hepatocytes was transported from the bile canaliculi to the bile ducts, in comparison to the native liver.

**Recellularized liver**

**Native liver**
